# Supplementary material
Source: PubMed Central journal article supplement (PMC3870679)
Supplement: 1314557110_pnas.201314557SI.pdf [file 1314557110_pnas.201314557SI.pdf]

# Supporting Information

Gilchrist et al. 10.1073/pnas.1314557110

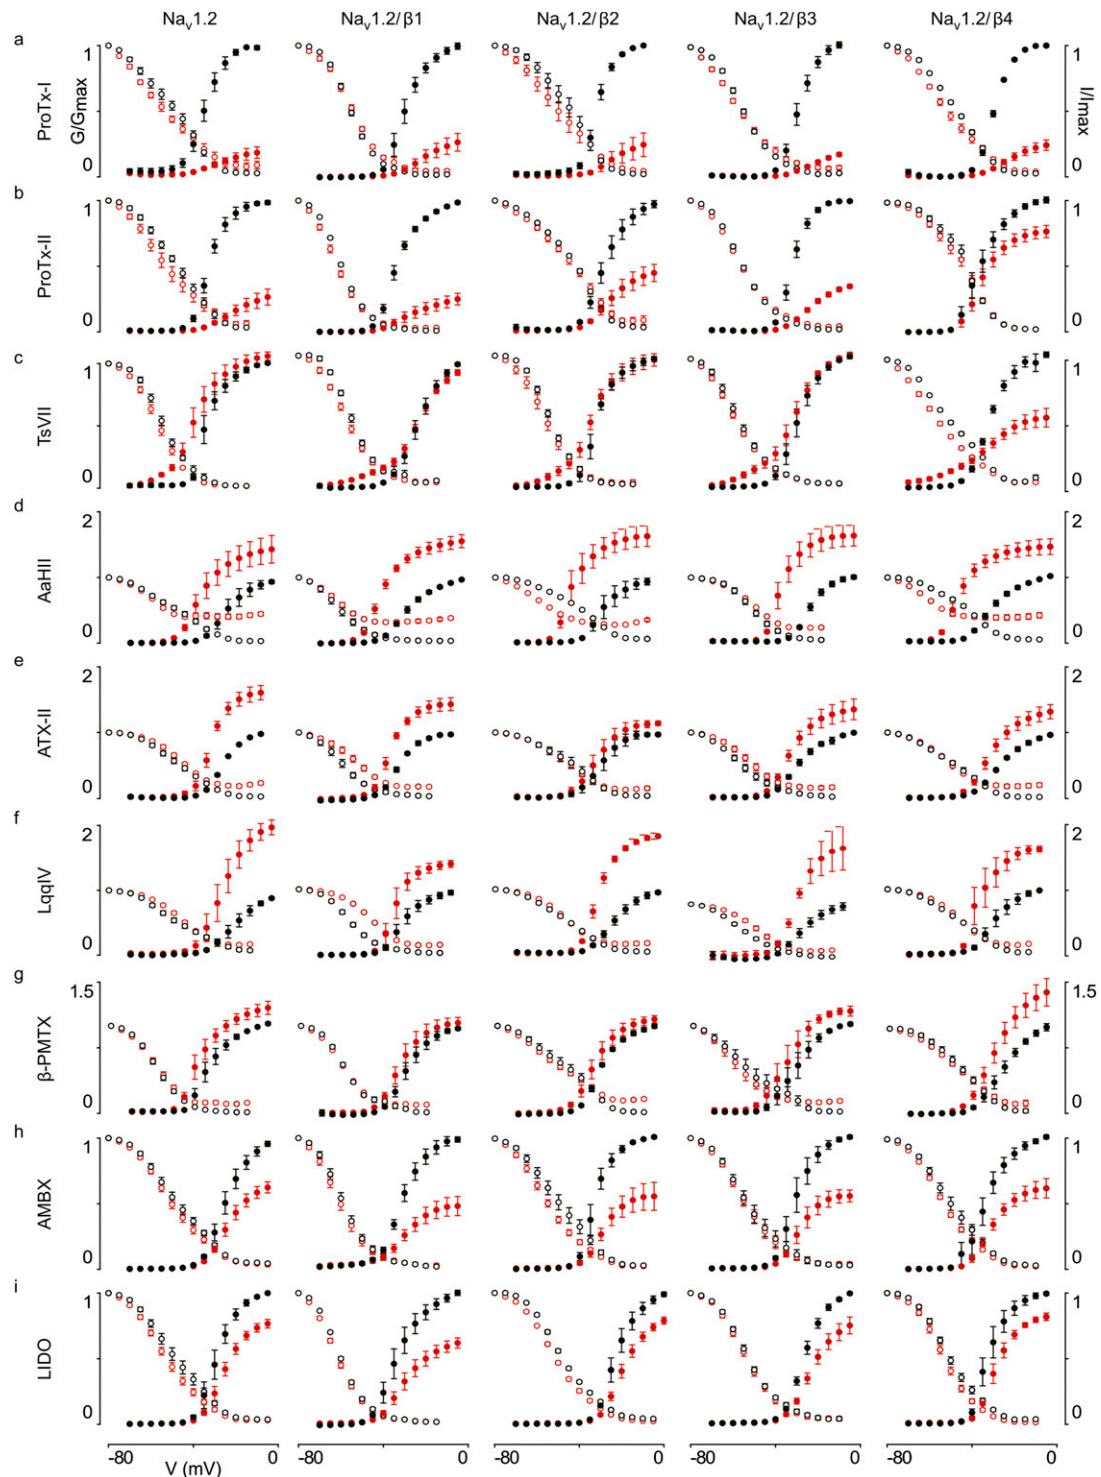

**Fig. S1.** Influence of  $\beta$ -subunits on the ligand susceptibility of the voltage-gated sodium channel  $\text{Na}_v1.2$ . Effect of 100 nM ProTx-I (A), 100 nM ProTx-II (B), 500 nM TsVII (C), 100 nM AaHII (D), 500 nM ATX-II (E), 100 nM LqIV (F), 10  $\mu\text{M}$   $\beta$ -PMTX (G), 10 mM lidocaine (LIDO) (H), and 500  $\mu\text{M}$  ambroxol (AMBX) (I) (all saturating concentrations) on  $\text{Na}_v1.2$  without and in the presence of  $\beta$ -subunits. Normalized conductance–voltage relationships ( $G/G_{\text{max}}$ ; black filled circle/red filled circle) and steady-state inactivation relationships ( $I/I_{\text{max}}$ ; black open circle/red open circle) are shown before (black) and after (red) toxin or drug application. Channel-expressing oocytes were depolarized in 5-mV steps from a holding potential of  $-90$  mV.  $n = 3$ –5; error bars represent S.E.M.



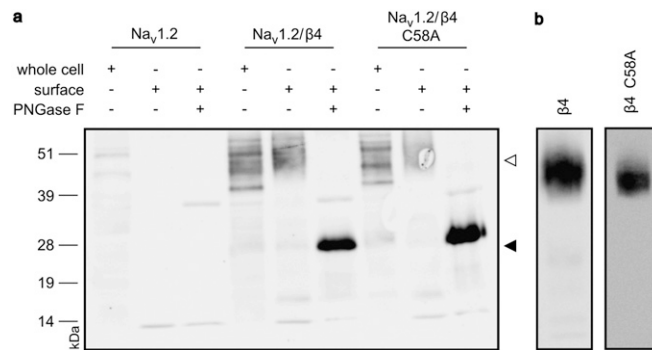

**Fig. S5.**  $\beta 4$  and the C58A mutant are glycosylated and traffic to the membrane. (A) Western blot analysis and biotinylation experiments demonstrate the presence of  $\beta 4$  and the C58A mutant on the oocyte membrane surface, albeit in a glycosylated form (open arrowhead). Removing  $\beta 4$  glycosylation using Peptide-*N*-Glycosidase F (PNGase F) incubation reveals the correct predicted molecular mass of 28 kDa (filled arrowhead). This figure shows data related to that shown in Fig. 4 but over a more extensive range of protein masses. (B) Without  $\text{Na}_v1.2$ ,  $\beta 4$  (1) and the C58A mutant still traffic to the oocyte membrane in a glycosylated form. A ladder in kilodaltons (kDa) is shown on the left.

1. Yu FH, et al. (2003) Sodium channel beta4, a new disulfide-linked auxiliary subunit with similarity to beta2. *J Neurosci* 23(20):7577–7585.

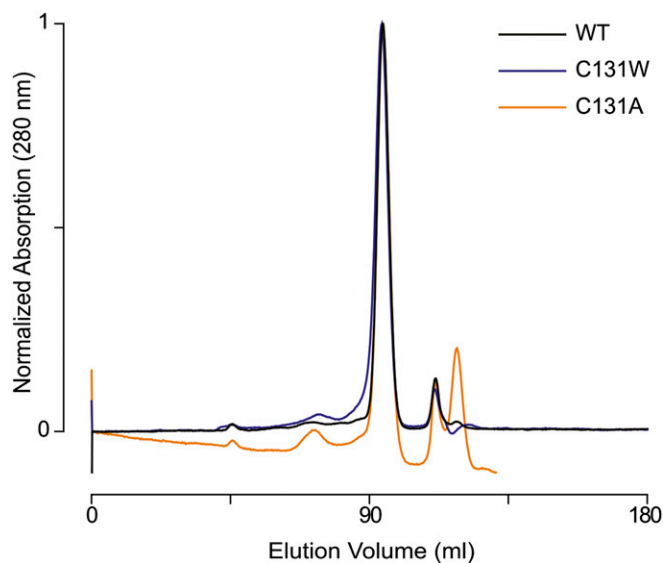

**Fig. S6.** Gel-filtration chromatograms of  $\beta 4$ , C131W, and C131A. All three chromatograms display a predominant peak corresponding to monomeric protein. Normalized absorption was recorded at 280 nm.

**Table S1.** Influence of ligands on the gating properties of  $\text{Na}_v1.2$  and  $\text{Na}_v1.2/\beta x$

| Ligand   | Parameter                  | $\text{Na}_v1.2$ , mV |                   | $\text{Na}_v1.2/\beta 1$ , mV |                   | $\text{Na}_v1.2/\beta 2$ , mV |                   | $\text{Na}_v1.2/\beta 3$ , mV |                   | $\text{Na}_v1.2/\beta 4$ , mV |                   |
|----------|----------------------------|-----------------------|-------------------|-------------------------------|-------------------|-------------------------------|-------------------|-------------------------------|-------------------|-------------------------------|-------------------|
|          |                            | Before                | After             | Before                        | After             | Before                        | After             | Before                        | After             | Before                        | After             |
| ProTx-I  | Activation ( $V_{1/2}$ )   | $-34.2 \pm 1.4$       | $-28.0 \pm 1.1^*$ | $-29.8 \pm 1.5$               | $-20.9 \pm 0.2^*$ | $-31.8 \pm 0.9$               | $-22.5 \pm 1.8^*$ | $-29.1 \pm 1.4$               | $-21.3 \pm 0.9^*$ | $-29.3 \pm 0.2$               | $-22.8 \pm 0.6^*$ |
|          | Inactivation ( $V_{1/2}$ ) | $-50.2 \pm 1.7$       | $-56.6 \pm 1.4$   | $-55.5 \pm 0.6$               | $-55.8 \pm 1.0$   | $-45.2 \pm 2.6$               | $-53.1 \pm 4.3$   | $-55.7 \pm 0.7$               | $-61.7 \pm 0.7$   | $-47.9 \pm 0.3$               | $-54.1 \pm 0.9^*$ |
| ProTx-II | Activation ( $V_{1/2}$ )   | $-32.3 \pm 0.9$       | $-22.5 \pm 0.2^*$ | $-33.6 \pm 0.9$               | $-24.8 \pm 3.0^*$ | $-27.7 \pm 2.1$               | $-24.6 \pm 2.1$   | $-31.7 \pm 1.0$               | $-24.0 \pm 0.9^*$ | $-31.1 \pm 3.3$               | $-34.6 \pm 3.4$   |
|          | Inactivation ( $V_{1/2}$ ) | $-49.2 \pm 1.3$       | $-55.2 \pm 2.5$   | $-60.0 \pm 0.3$               | $-63.5 \pm 1.0$   | $-43.0 \pm 0.3$               | $-46.3 \pm 1.3$   | $-56.1 \pm 0.5$               | $-57.8 \pm 0.2$   | $-43.2 \pm 0.9$               | $-44.7 \pm 1.5$   |
| TsVII    | Activation ( $V_{1/2}$ )   | $-33.5 \pm 1.5$       | $-38.6 \pm 2.1^*$ | $-23.0 \pm 1.8$               | $-23.4 \pm 1.2$   | $-32.0 \pm 0.9$               | $-35.0 \pm 0.9$   | $-29.6 \pm 1.9$               | $-31.1 \pm 2.4$   | $-31.0 \pm 1.0$               | $-33.0 \pm 1.7$   |
|          | Inactivation ( $V_{1/2}$ ) | $-54.3 \pm 1.0$       | $-56.9 \pm 1.0$   | $-55.4 \pm 0.4$               | $-58.1 \pm 0.8$   | $-53.7 \pm 0.7$               | $-56.8 \pm 1.8$   | $-57.6 \pm 1.2$               | $-59.8 \pm 1.1$   | $-51.8 \pm 0.6$               | $-59.4 \pm 1.5^*$ |
| LqqIV    | Activation ( $V_{1/2}$ )   | $-18.5 \pm 0.7$       | $-24.4 \pm 1.4^*$ | $-28.2 \pm 1.7$               | $-31.8 \pm 1.8$   | $-24.5 \pm 1.5$               | $-32.4 \pm 0.8^*$ | $-28.4 \pm 1.7$               | $-32.3 \pm 1.8$   | $-30.0 \pm 2.3$               | $-37.2 \pm 3.0$   |
|          | Inactivation ( $V_{1/2}$ ) | $-50.5 \pm 1.5$       | $-48.0 \pm 0.8$   | $-56.8 \pm 0.6$               | $-48.1 \pm 0.3^*$ | $-47.7 \pm 0.5$               | $-48.9 \pm 0.6$   | $-56.9 \pm 1.0$               | $-50.9 \pm 1.0^*$ | $-47.3 \pm 0.5$               | $-48.0 \pm 0.6$   |
| AMBX     | Activation ( $V_{1/2}$ )   | $-24.4 \pm 1.9$       | $-23.3 \pm 1.8$   | $-30.5 \pm 1.7$               | $-29.2 \pm 1.7$   | $-32.8 \pm 1.5$               | $-29.5 \pm 0.6$   | $-30.4 \pm 2.1$               | $-28.4 \pm 1.3$   | $-34.1 \pm 2.7$               | $-31.2 \pm 1.7$   |
|          | Inactivation ( $V_{1/2}$ ) | $-49.1 \pm 2.0$       | $-51.5 \pm 1.5$   | $-60.0 \pm 1.2$               | $-61.9 \pm 1.4$   | $-50.7 \pm 2.6$               | $-57.4 \pm 1.4$   | $-54.3 \pm 1.9$               | $-55.4 \pm 1.3$   | $-50.7 \pm 2.0$               | $-54.2 \pm 0.8$   |

Results are the average of three to five oocyte recordings and errors are SEM. The table presents data related to Fig. 1 in the main text.

\*A statistically significant difference before and after toxin addition to  $\text{Na}_v1.2$  without or in the presence of a particular  $\beta$ -subunit (Student *t* test with  $P < 0.005$ ).

**Table S2. Disease mutations mapped onto the  $\beta 4$  structure**

|           | Mutation (ref.) | Disease phenotype                   | Residue | Location                                                    | Solvent-accessible surface area, $\text{\AA}^2$ <sup>†</sup> |
|-----------|-----------------|-------------------------------------|---------|-------------------------------------------------------------|--------------------------------------------------------------|
| $\beta 1$ | R85H (1)        | Atrial fibrillation                 | K96     | End of $\beta_5$                                            | 61.9                                                         |
|           | E87Q (2)        | Cardiac conduction defect           | D98     | $\beta_5$ - $\beta_6$ loop                                  | 21.4                                                         |
|           | I106P (3)       | Dravet syndrome                     | I116    | $\beta_7$ , within hydrophobic core                         | 0.7                                                          |
|           | C121W (4)       | GEFS+                               | C131    | $\beta_8$ , affects conserved cysteine bond                 | 0.9                                                          |
|           | R125L (5)       | GEFS+                               | N135    | End of $\beta_8$ , lines pocket next to $^{58}\text{Cys}$ . | 14.3                                                         |
|           | R125C (6)       | Dravet syndrome                     | N135    | End of $\beta_8$ , lines pocket next to $^{58}\text{Cys}$   | 14.3                                                         |
|           | V138I (7)       | Idiopathic epilepsy                 | —       | Insertion in $\beta_9$ - $\beta_{10}$ loop                  | —                                                            |
| $\beta 3$ | V54G (8)        | Idiopathic ventricular fibrillation | —       | Insertion in $\beta_2$ - $\beta_3$ loop                     | —                                                            |
|           | Q89L (9)        | Colorectal cancer*                  | D98     | $\beta_5$ - $\beta_6$ loop, surface accessible              | 21.4                                                         |
|           | V110I (10)      | Brugada syndrome                    | L121    | $\beta_7$ - $\beta_{10}$ loop, within hydrophobic core      | 0                                                            |

Although several  $\beta 2$  and  $\beta 4$  mutations have been implicated in atrial fibrillation and LQTS in humans, the amino acid substitutions involved occur outside of the crystal structure reported in this work and are not represented in this table. GEFS+: generalized epilepsy plus febrile seizures plus.

\*Mutation found in a screen of colorectal cancer sample. The pathogenicity of the mutation has not been established, but the same position is also affected in a  $\beta 1$  mutation.

<sup>†</sup>Accessible surface area is for the side chain of the WT residue only.

1. Watanabe H, et al. (2009) Mutations in sodium channel  $\beta 1$ - and  $\beta 2$ -subunits associated with atrial fibrillation. *Circ Arrhythm Electrophysiol* 2(3):268–275.
2. Fendri-Kriaa N, et al. (2011) New mutation c.374C>T and a putative disease-associated haplotype within SCN1B gene in Tunisian families with febrile seizures. *Eur J Neurol* 18(5): 695–702.
3. Ishikawa T, et al. (2013) Novel SCN3B mutation associated with brugada syndrome affects intracellular trafficking and function of Nav1.5. *Circ J* 77(4):959–967.
4. Wallace RH, et al. (1998) Febrile seizures and generalized epilepsy associated with a mutation in the Na<sup>+</sup>-channel beta1 subunit gene SCN1B. *Nat Genet* 19(4):366–370.
5. Patino GA, et al. (2009) A functional null mutation of SCN1B in a patient with Dravet syndrome. *J Neurosci* 29(34):10764–10778.
6. Ogiwara I, et al. (2012) A homozygous mutation of voltage-gated sodium channel  $\beta 1$  gene SCN1B in a patient with Dravet syndrome. *Epilepsia* 53(12):e200–e203.
7. Orrico A, et al. (2009) Mutational analysis of the SCN1A, SCN1B and GABRG2 genes in 150 Italian patients with idiopathic childhood epilepsies. *Clin Genet* 75(6):579–581.
8. Valdivia CR, et al. (2010) Loss-of-function mutation of the SCN3B-encoded sodium channel beta3 subunit associated with a case of idiopathic ventricular fibrillation. *Cardiovasc Res* 86(3):392–400.
9. Sjöblom T, et al. (2006) The consensus coding sequences of human breast and colorectal cancers. *Science* 314(5797):268–274.
10. Baroni D, Barbieri R, Picco C, Moran O (2013) Functional modulation of voltage-dependent sodium channel expression by wild type and mutated C121W- $\beta 1$  subunit. *J Bioenerg Biomembr* 45(4):353–368.
